# Supplementary material for: Genome-wide transcriptomic analysis of the sporophyte of the moss Physcomitrella patens
Source: PubMed Central journal article supplement — J Exp Bot. 2013 Aug 14;64(12):3567–81. doi: 10.1093/jxb/ert190 (PMC3745722; doi:10.1093/jxb/ert190), 2013-08-14
Supplement: supp_ert190_jexbot096909_file002.pdf [file supp_ert190_jexbot096909_file002.pdf]

## Primers

|        | Forward primer        | Reverse primer          |
|--------|-----------------------|-------------------------|
| 135644 | ACATCATTTGCGTGTCTCGAA | GCTTTTTGCAGCTTTTCCAC    |
| 70357  | ACGCTTCCTCAGAACTCCAA  | GTCAGAACTGCCTGCACAA     |
| 149790 | CAAGACAATCGACGGGAGAT  | GAGCCAGGTCAAGTTGCTTC    |
| 97861  | TTCCCCGGTGTACACTTCTC  | GGTTTGTCCACGAAGCAACT    |
| Rbcs   | TTGTGGCTCCTGTCTCTGTG  | CGAGAAGGTCTCGAACTTGG    |
| 11916  | TGGACATGCGACCTACTCTGG | CGCCAAACCCGTAGCAAATA    |
| 146196 | TGCTCAATTGCCTACTGTGG  | AACCGTCACCGCAATAAAAG    |
| 149962 | CACTGCCATCTGCCTGTTTA  | CGCTGCATTGATGGAGATTA    |
| 163268 | ATGGGTCACGTCGACTTCAAA | CATGACTGTGAGGGGAGAAACA  |
| 100530 | ACTGACCTCCAGGCAGTTGT  | TACACAAATCCCCAATGCAC    |
| 184189 | AGCTGTTCAGCTGGGAGAAA  | TGCATTTTCAGCCTTCACTTG   |
| Actin2 | GCGAAGAGCGAGTATGACGAG | AGCCACGAATCTAACTTGTGATG |

Table S2 The number of genes associated in the total annotated genome, Gametophyte vs. early sporophyte, gametophyte vs. mid-sporophyte and early sporophyte vs. mid-sporophyte. The percentage of genes in each category studied here is included as a proportion of the total number of genes associated with each GO term.

| GO term                                    | Total no. of genes associated with GO term | GvsES | GvsES % compared to total no. of <i>P. patens</i> | GvsMS | GvsMS % compared to total no. of <i>P. patens</i> | ESvsMS | ESvsMS % compared to total no. of <i>P. patens</i> |
|--------------------------------------------|--------------------------------------------|-------|---------------------------------------------------|-------|---------------------------------------------------|--------|----------------------------------------------------|
| Carbohydrate metabolic process             | 643                                        | 164   | 25.5%                                             | 146   | 22.7%                                             | 30     | 4.7%                                               |
| Protein amino acid phosphorylation         | 815                                        | 126   | 15.5%                                             | 112   | 13.7%                                             | 50     | 6.1%                                               |
| Regulation of transcription, DNA dependent | 686                                        | 100   | 14.6%                                             | 81    | 11.8%                                             | 32     | 4.7%                                               |
| Proteolysis                                | 739                                        | 91    | 12.3%                                             | 92    | 12.5%                                             | 20     | 2.7%                                               |
| Electron transport                         | 558                                        | 124   | 22.2%                                             | 115   | 20.6%                                             | 29     | 5.2%                                               |
| Signal transduction                        | 360                                        | 59    | 16.4%                                             | 53    | 14.7%                                             | 19     | 5.3%                                               |
| Lipid metabolic process                    | 272                                        | 52    | 19.1%                                             | 63    | 23.2%                                             | 11     | 4.0%                                               |
| Protein ubiquitination                     | 273                                        | 41    | 15.0%                                             | 44    | 16.2%                                             | 13     | 4.8%                                               |
| Response to stress                         | 287                                        | 45    | 15.7%                                             | 34    | 11.8%                                             | 14     | 4.9%                                               |
| Fatty acid metabolic process               | 85                                         | 23    | 27.1%                                             | 31    | 36.5%                                             | 3      | 3.5%                                               |
| Cell wall organisation                     | 114                                        | 38    | 33.3%                                             | 39    | 34.2%                                             | 14     | 12.3%                                              |

|                              |     |     |       |     |       |    |      |
|------------------------------|-----|-----|-------|-----|-------|----|------|
| Glycolysis                   | 93  | 20  | 21.5% | 21  | 22.6% | 6  | 6.5% |
| Amino acid metabolic process | 304 | 164 | 53.9% | 146 | 48.0% | 30 | 9.9% |
| Transmembrane transport      | 106 | 13  | 12.3% | 14  | 13.2% | 6  | 5.7% |
| Vitamin metabolic process    | 60  | 17  | 28.3% | 16  | 26.7% | 5  | 8.3% |
| Response to hormone stimulus | 13  | 6   | 46.2% | 3   | 23.1% | 0  | 0%   |
| Reproduction                 | 13  | 4   | 30.8% | 3   | 23.1% | 1  | 7.7% |
| Photosynthesis               | 110 | 43  | 39.1% | 46  | 41.8% | 1  | 0.9% |
| Apoptosis                    | 30  | 2   | 6.7%  | 3   | 10%   | 3  | 10%  |
